# Supplementary material for: Error Size Shape Relationships between Motor Variability and Implicit Motor Adaptation
Source: MDPI journal article supplement (doi:10.3390/biology12030404), 2023-03-03
Supplement: s1 [file s1]

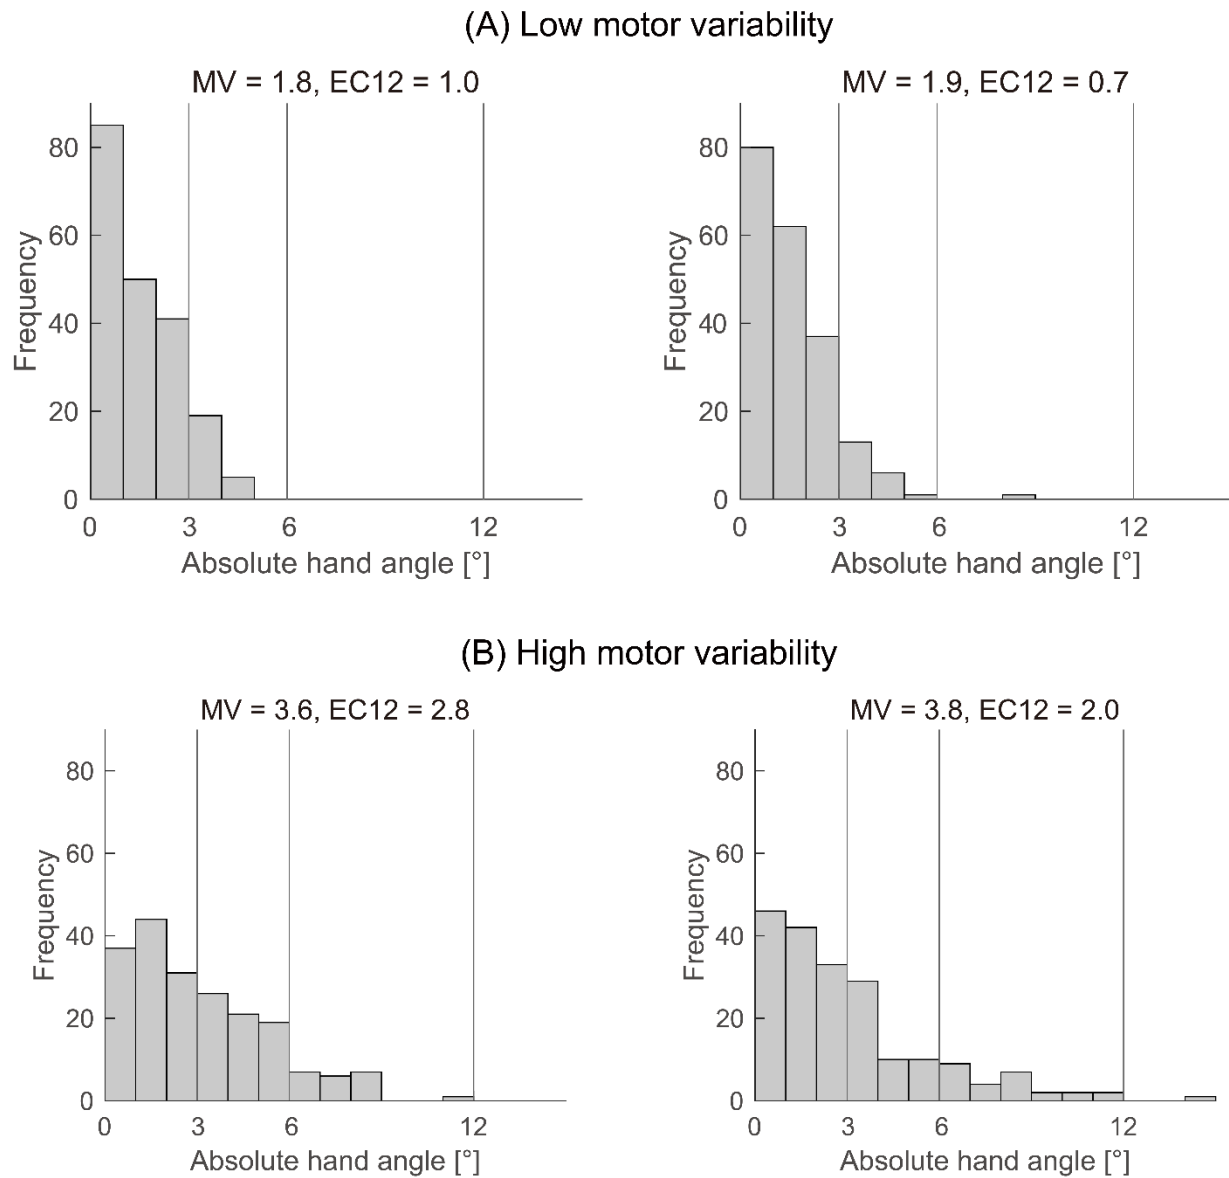

**Figure S2.** Absolute hand angle in the baseline phase. Representative participants with (A) low and (B) high motor variability. The histograms show that participants with high variability tend to have a wide distribution of the absolute hand angle in the baseline phase. MV and EC12 represent motor variability in the baseline phase and error correction for 12° absolute error, respectively.
